# Supplementary material for: Gymnemic Acids Inhibit Hyphal Growth and Virulence in Candida albicans
Source: PLOS journal article supplement (doi:10.1371/journal.pone.0074189), 2013-09-11

Figure S1. MS and analytical chromatograms of GA-IV (**2**) as detected by ELSD, MS ES+ TIC and MS ES- TIC mode, respectively.

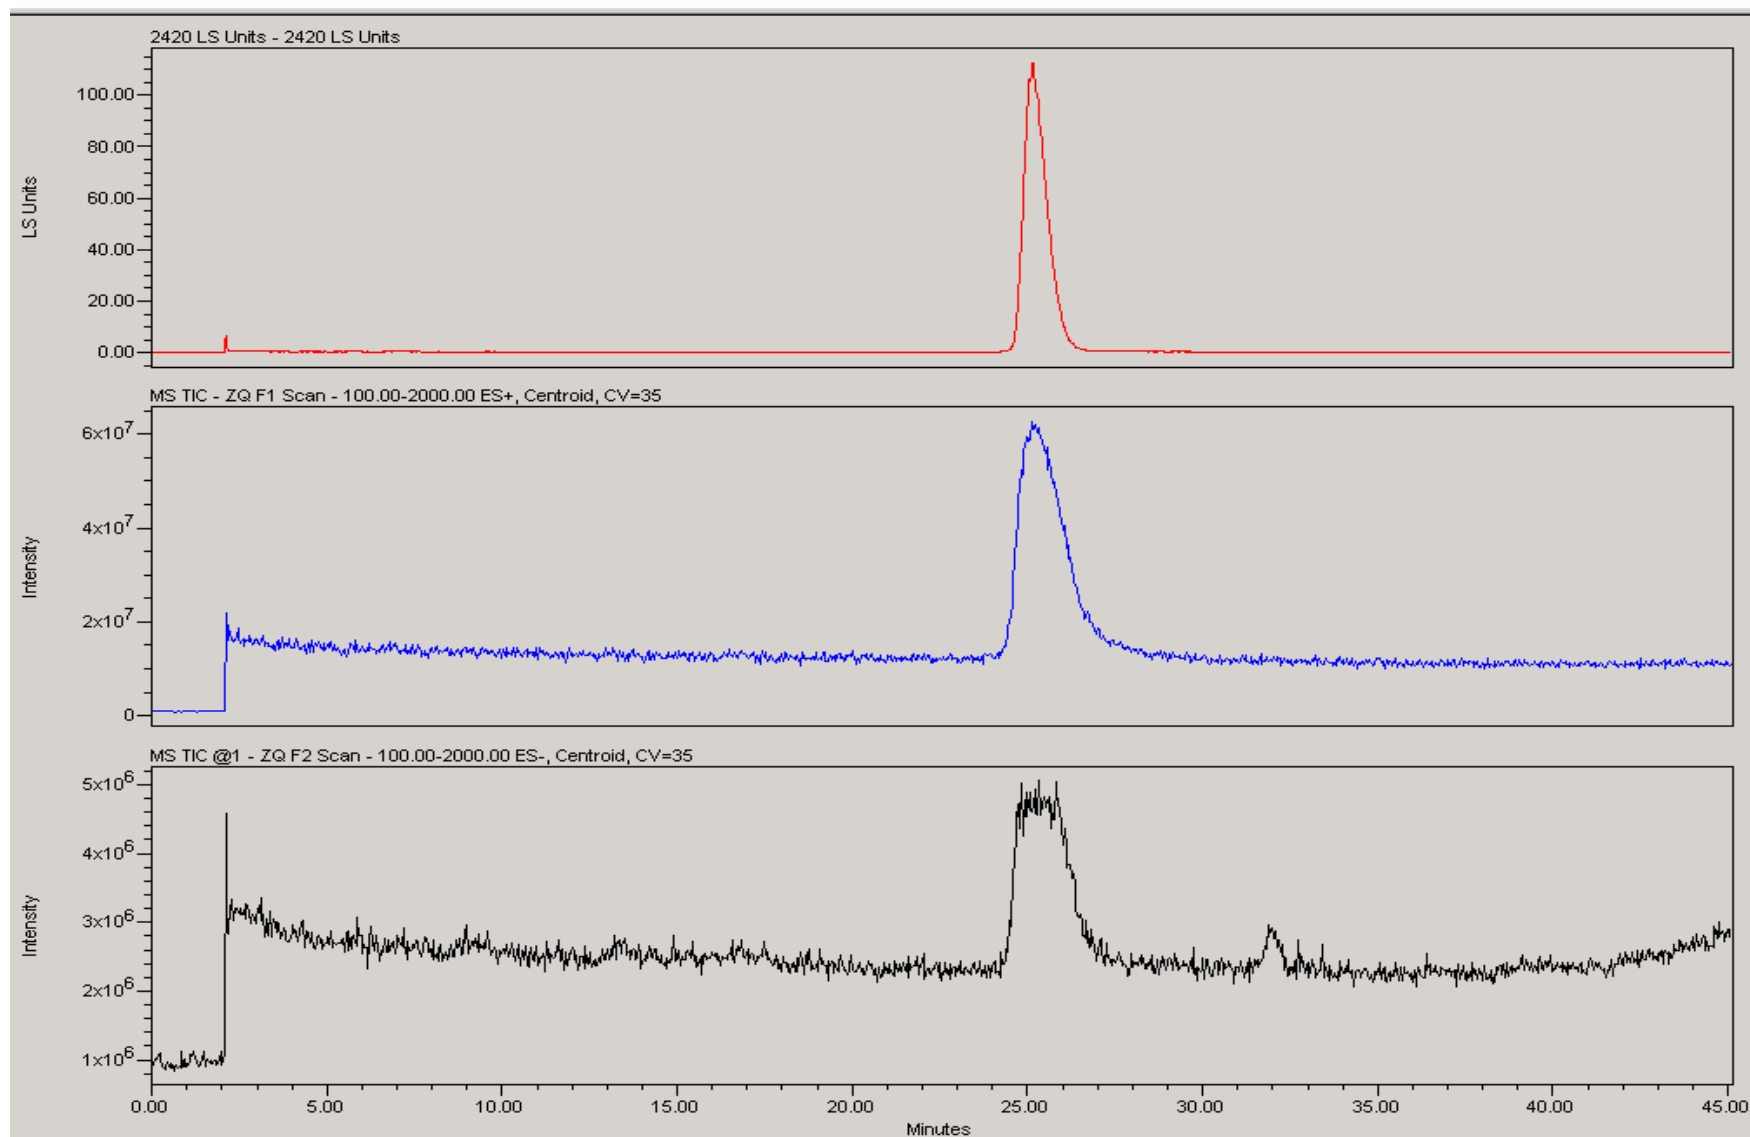

Supplement: S1 (10.1371/journal.pone.0074189.s001) [file journal.pone.0074189.s001]
