# Supplementary material for: Gymnemic Acids Inhibit Hyphal Growth and Virulence in Candida albicans
Source: PLOS journal article supplement (doi:10.1371/journal.pone.0074189), 2013-09-11

Figure S21. GAs inhibit *C. albicans* yeast-to-hyphal transition in other hyphal growth conditions.

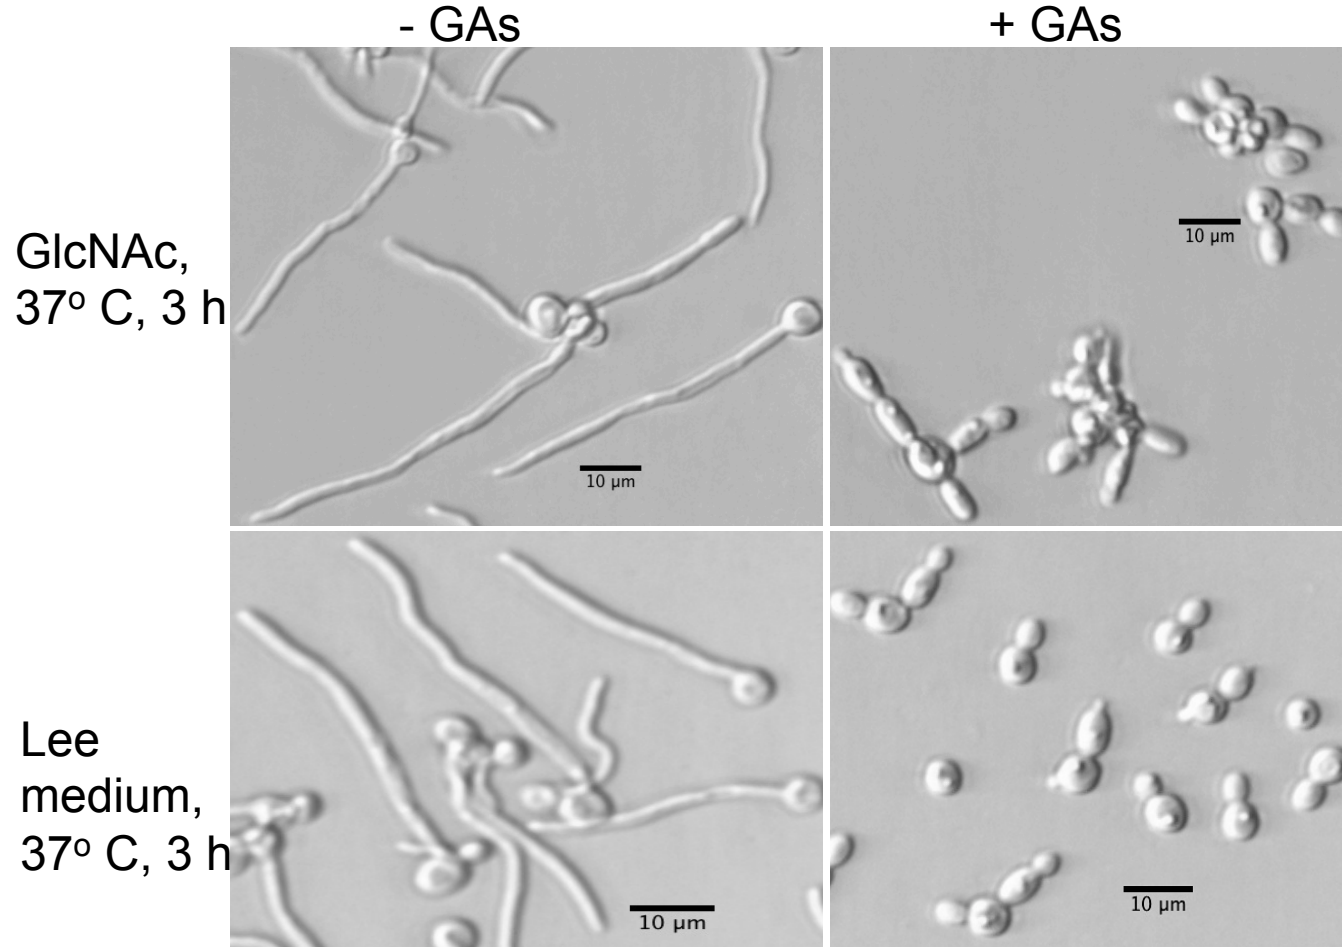

Supplement: S21 (10.1371/journal.pone.0074189.s021) [file journal.pone.0074189.s021]
